# Supplementary material for: Differential Long-Chain Polyunsaturated Fatty Acids Status and Placental Transport in Adolescent Pregnancies
Source: Nutrients. 2018 Feb 15;10(2):220. doi: 10.3390/nu10020220 (PMC5852796; doi:10.3390/nu10020220)
Supplement: Supplementary file 1 [file nutrients-10-00220-s001.pdf]

Supplementary Materials:

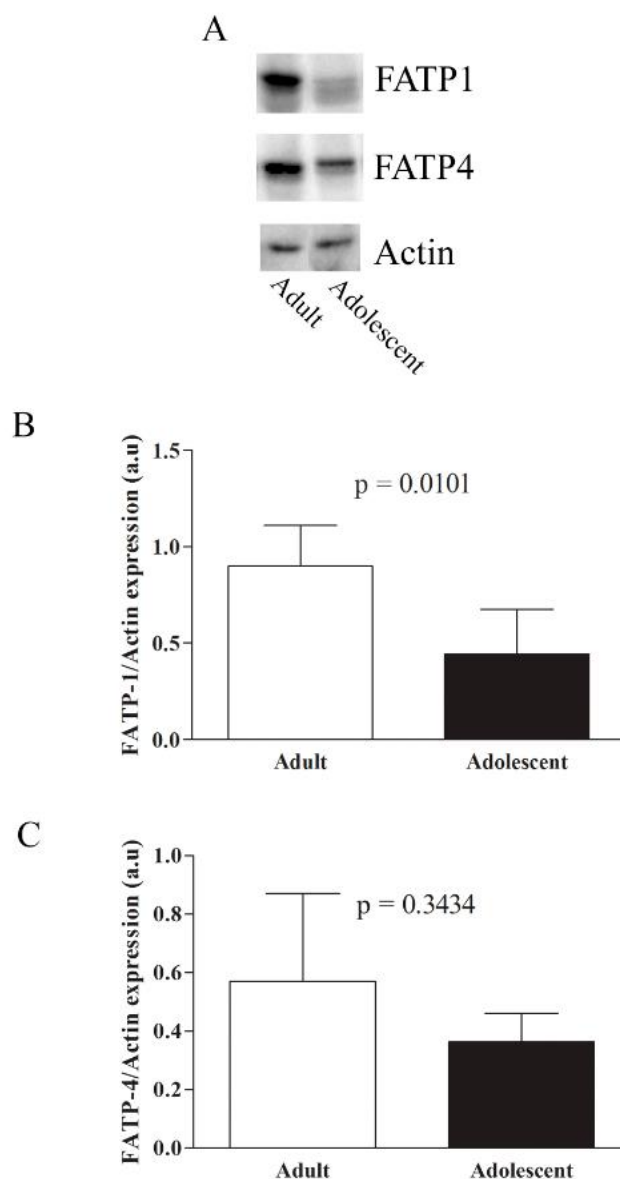

**Figure S1.** Placental protein expression of FATP1 and FATP4. (A) Placental protein expression of FATP1 and FATP4 in adults ( $n = 7$ ) and adolescents ( $n = 6$ ). Placental densitometric analysis of (B) FATP1 and (C) FATP4 after normalization by actin. Results are expressed as mean  $\pm$  SD.  $p < 0.05$  was considered significantly different according to unpaired  $t$  test.

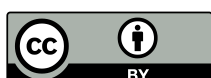

© 2018 by the authors. Submitted for possible open access publication under the terms and conditions of the Creative Commons Attribution (CC BY) license (<http://creativecommons.org/licenses/by/4.0/>).
